# Supplementary material for: Separation or combination of non-covalently linked partners provides polymorphs of N-(aryl)-2-(propan-2-ylidene)hydrazine carbothioamides
Source: Royal Society of Chemistry journal article supplement (doi:10.1039/c8ce02000k), 2019-01-01
Supplement: c8ce02000k1.pdf [file c8ce02000k1.pdf]

## Supporting information

Separation or union of non-covalently linked partners provide polymorphs of N-(Aryl)-2-(propan-2-ylidene)hydrazine carbothioamides

Arup Tarai, Jubaraj Bikash Baruah\*

Department of Chemistry, Indian Institute of Technology Guwahati, Guwahati -781 039, Assam, India.

Fax: +91-361-2690762; Ph. +91-361-2582311;

email: [juba@iitg.ac.in](mailto:juba@iitg.ac.in) <http://www.iitg.ac.in/juba>

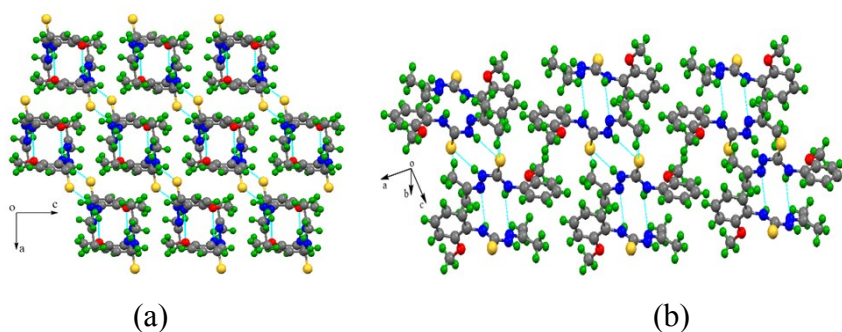

**Figure S1:** Packing diagrams of polymorph (a) **Methoxypoly1** and (b) **Methoxypoly2**.

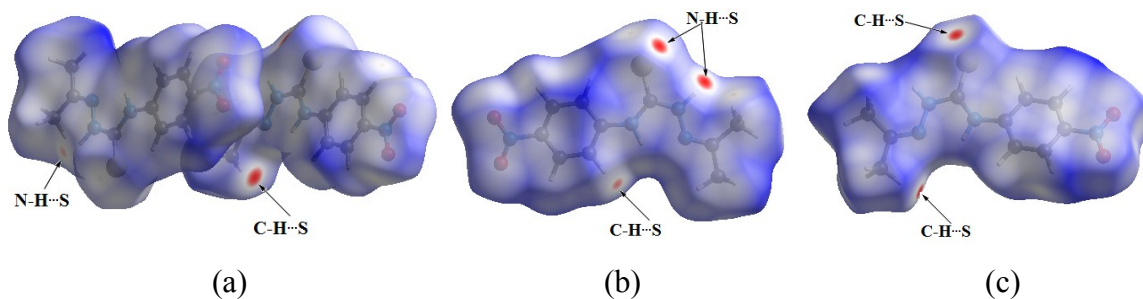

**Figure S2:** Hirshfeld surface analysis of (a) **Nitropoly1**, (b) **Nitropoly2** and (c) **Nitropoly3** showing  $d_{\text{norm}}$  surfaces with different hydrogen bonding interactions.

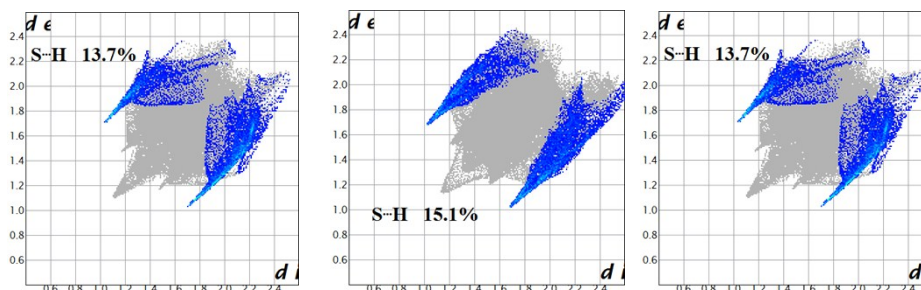

(a) (b) (c)

**Figure S3:** Fingerprint plots for (a) **Nitropoly1**, (b) **Nitropoly2** and (c) **Nitropoly3** with S...H interactions highlighted in colour.

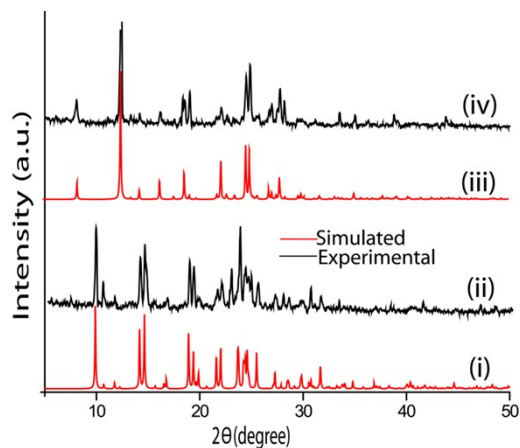

**Figure S4:** Simulated (i and iii) and experimental (ii and iv) powder X-ray diffraction patterns of polymorph **Methoxypoly1** and **Methoxypoly2** respectively.

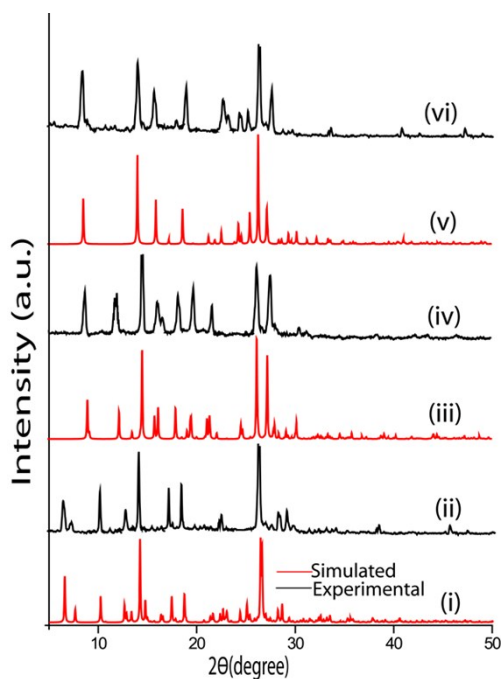

**Figure S5:** Simulated (i, iii and v) and experimental (ii, iv and vi) powder X-ray diffraction patterns of polymorph **Nitropoly1**, **Nitropoly2** and **Nitropoly3** respectively.

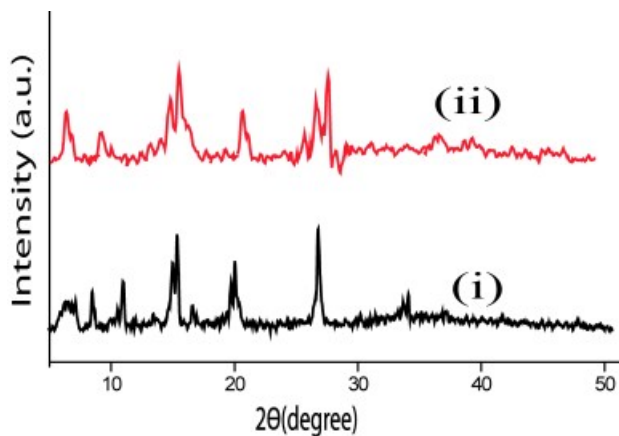

**Figure S6:** Experimental powder X-ray diffraction patterns of (i) crude compound  $H_2L_1$  and (ii) polymorph **Nitropoly1** after heating to 200 °C.

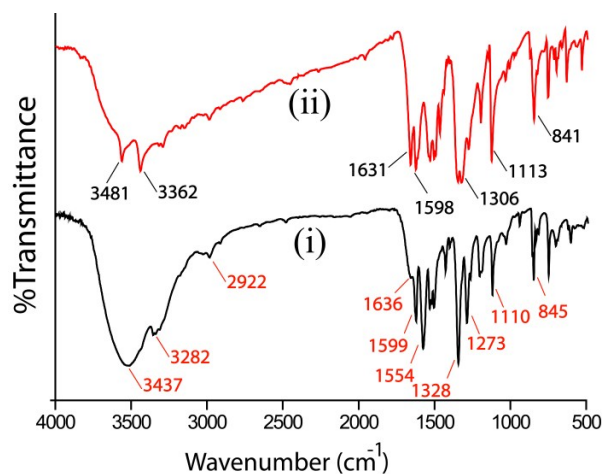

**Figure S7:** FTIR spectra of (i) crude compound  $H_2L_1$  and (ii) polymorph **Nitropoly1** after heating to 200 °C.

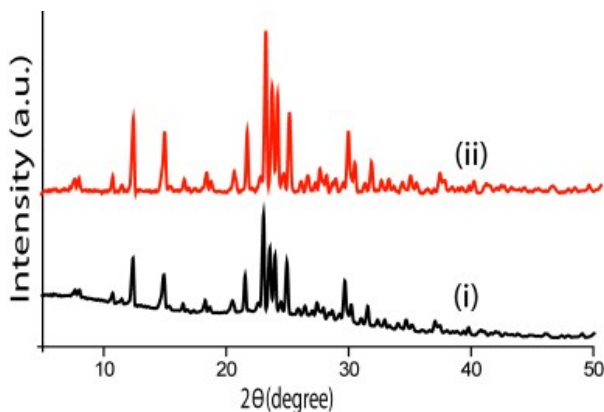

**Figure S8:** Experimental powder X-ray diffraction patterns of (i) crude compound **H<sub>2</sub>L** and (ii) solid product obtained from crystallization of **H<sub>2</sub>L** from a precipitated compound from solvents other than the one where suitable crystals were obtained.

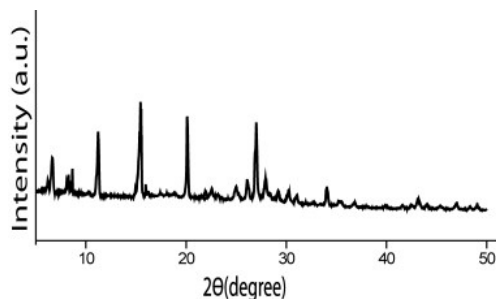

**Figure S9:** Powder X-ray diffraction pattern of solid product obtained from crystallization of **H<sub>2</sub>L<sub>1</sub>** from a precipitated compound from solvents other than the one where suitable crystals were obtained.

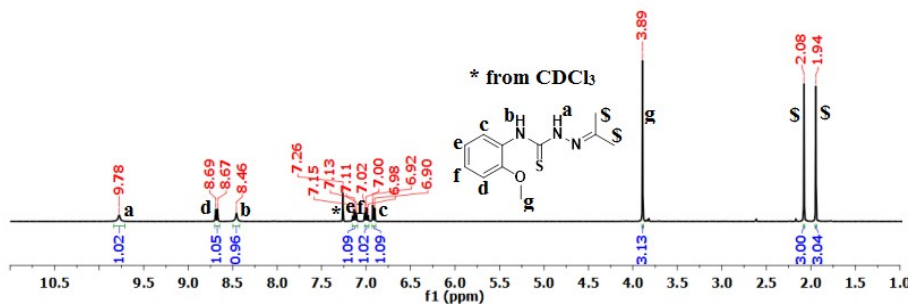

**Figure S10:** <sup>1</sup>H-NMR (600 MHz, CDCl<sub>3</sub>) spectra of **H<sub>2</sub>L**.

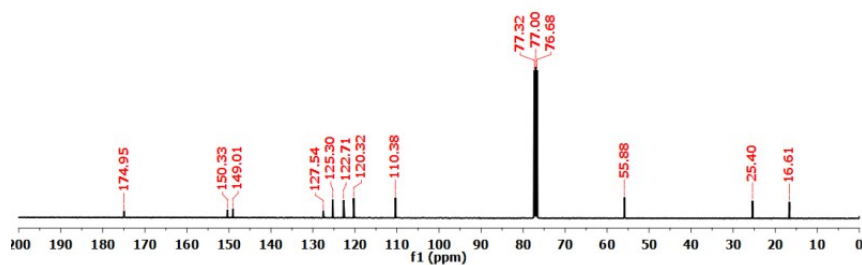

**Figure S11:** <sup>13</sup>C-NMR (150 MHz, CDCl<sub>3</sub>) spectra of **H<sub>2</sub>L**.

**Table S1:** Different torsion angles of polymorph **Methoxypoly1** and **Methoxypoly2**.

| Compound <b>H<sub>2</sub>L</b>                                                    | Torsion angle (°) | <b>Methoxypoly1</b> | <b>Methoxypoly2</b> |
|-----------------------------------------------------------------------------------|-------------------|---------------------|---------------------|
| 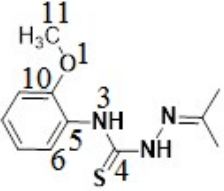 | C6-C5-N3-C4       | -77.8(3)            | -61.9(4)            |
|                                                                                   | N2-C4-N3-C5       | -178.2(2)           | -176.5(2)           |
|                                                                                   | S1-C4-N3-C5       | 2.0(3)              | 1.7(4)              |
|                                                                                   | C5-C10-O1-C11     | -174.7(2)           | 177.4(3)            |

**Table S2:** Different torsion angles of polymorph **Nitropoly1**, **Nitropoly2** and **Nitropoly3**.

| compound <b>H<sub>2</sub>L<sub>1</sub></b>                                        | Torsion angle (°) | <b>Nitropoly1</b> <sup>#</sup> | <b>Nitropoly2</b> | <b>Nitropoly3</b> |
|-----------------------------------------------------------------------------------|-------------------|--------------------------------|-------------------|-------------------|
| 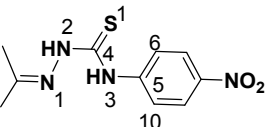 | S1-C4-N2-N1       | -179.9(2)/175.5(2)             | -177.0(2)         | 179.1(5)          |
|                                                                                   | S1-C4-N3-C5       | -5.9(5)/180.0(3)               | -0.2(4)           | 1.0(1)            |
|                                                                                   | C6-C5-N3-C4       | 1.1(5)/5.1(5)                  | -3.4(4)           | 9.0(1)            |
|                                                                                   | C10-C5-N3-C4      | -177.7(3)/-175.2(3)            | 176.2(2)          | -171.5(6)         |

# Torsion angles are from CCDC recode SEWYIF but numberings here are as per the figure given in the first column.

**Table S3:** Relative contributions from various interactions from Hirshfeld analysis of different polymorphs of **H<sub>2</sub>L** and **H<sub>2</sub>L<sub>1</sub>**.

|       | <b>Methoxypoly1</b> | <b>Nitropoly2</b> | <b>Nitropoly1</b> | <b>Nitropoly2</b> | <b>Nitropoly3</b> |
|-------|---------------------|-------------------|-------------------|-------------------|-------------------|
| O...O | 0.0                 | 0.0               | 0.0               | 0.0               | 0.0               |
| N...O | 0.0                 | 0.0               | 1.0               | 0.4               | 0.0               |
| C...O | 0.1                 | 0.4               | 2.0               | 4.2               | 4.0               |
| H...O | 5.7                 | 5.4               | 23.4              | 22.4              | 23.2              |
| S...H | 17.0                | 14.7              | 13.7              | 15.1              | 13.7              |
| C...N | 0.1                 | 1.1               | 5.2               | 4.5               | 4.9               |
| N...H | 5.8                 | 6.2               | 3.4               | 3.2               | 5.9               |
| C...H | 13.8                | 17.0              | 7.6               | 9.6               | 7.6               |
| C...C | 2.0                 | 0.8               | 4.4               | 2.2               | 3.3               |
| H...H | 54.8                | 53.8              | 36.8              | 35.9              | 35.9              |

### DFT calculation details:

Gaussian 09 was used for all calculations. Optimization was done by DFT using B3LYP/6-31+G(d,p) as basis set.

**Table S4:** XYZ coordinates of self-assembly of polymorph **Methoxypoly1**.

| Center Number | Atomic Number | Coordinates (Angstroms) |           |           |
|---------------|---------------|-------------------------|-----------|-----------|
|               |               | X                       | Y         | Z         |
| 1             | 16            | -1.686311               | -1.359705 | 0.146722  |
| 2             | 6             | -2.615480               | 0.053671  | 0.124402  |
| 3             | 6             | -5.005031               | -0.789795 | 0.080141  |
| 4             | 6             | -6.307871               | -0.241964 | -0.058029 |
| 5             | 6             | -2.159406               | 3.572832  | 0.137497  |
| 6             | 6             | -7.426593               | -1.069677 | -0.077424 |
| 7             | 1             | -8.418518               | -0.645787 | -0.184449 |
| 8             | 6             | -4.870109               | -2.174965 | 0.201786  |
| 9             | 1             | -3.881579               | -2.597190 | 0.310732  |
| 10            | 6             | -7.270845               | -2.455232 | 0.040900  |
| 11            | 1             | -8.148619               | -3.094996 | 0.023729  |
| 12            | 6             | -3.069377               | 4.767737  | 0.043372  |
| 13            | 1             | -4.108664               | 4.452541  | -0.073101 |
| 14            | 1             | -2.791486               | 5.400851  | -0.810170 |
| 15            | 1             | -2.983115               | 5.393079  | 0.942152  |
| 16            | 6             | -0.679897               | 3.818794  | 0.285641  |
| 17            | 1             | -0.242219               | 3.203978  | 1.080194  |
| 18            | 1             | -0.484095               | 4.869017  | 0.518014  |
| 19            | 1             | -0.141617               | 3.575010  | -0.639360 |
| 20            | 6             | -5.999511               | -2.998886 | 0.180141  |
| 21            | 1             | -5.869916               | -4.073136 | 0.274944  |
| 22            | 6             | -7.615765               | 1.755610  | -0.290168 |
| 23            | 1             | -8.135270               | 1.429940  | -1.200487 |
| 24            | 1             | -7.411904               | 2.825950  | -0.352742 |
| 25            | 1             | -8.252089               | 1.555485  | 0.581494  |
| 26            | 8             | -6.351885               | 1.125304  | -0.163120 |
| 27            | 7             | -1.977114               | 1.272820  | 0.140975  |
| 28            | 1             | -0.953620               | 1.257830  | 0.107976  |
| 29            | 7             | -3.964590               | 0.155872  | 0.095306  |
| 30            | 1             | -4.284275               | 1.123922  | 0.050887  |
| 31            | 7             | -2.722793               | 2.418365  | 0.076845  |
| 32            | 16            | 1.686268                | 1.359725  | -0.146639 |
| 33            | 6             | 2.615441                | -0.053648 | -0.124305 |
| 34            | 6             | 5.005008                | 0.789808  | -0.080236 |
| 35            | 6             | 6.307852                | 0.241953  | 0.057800  |
| 36            | 6             | 2.159465                | -3.572828 | -0.137186 |
| 37            | 6             | 7.426592                | 1.069643  | 0.077088  |
| 38            | 1             | 8.418520                | 0.645732  | 0.184010  |
| 39            | 6             | 4.870102                | 2.174983  | -0.201854 |
| 40            | 1             | 3.881570                | 2.597229  | -0.310696 |
| 41            | 6             | 7.270860                | 2.455201  | -0.041212 |
| 42            | 1             | 8.148648                | 3.094947  | -0.024126 |
| 43            | 6             | 3.069509                | -4.767686 | -0.043174 |
| 44            | 1             | 4.108801                | -4.452435 | 0.073107  |
| 45            | 1             | 2.791795                | -5.400777 | 0.810442  |
| 46            | 1             | 2.983123                | -5.393069 | -0.941913 |
| 47            | 6             | 0.679945                | -3.818863 | -0.285103 |
| 48            | 1             | 0.242176                | -3.204277 | -1.079785 |
| 49            | 1             | 0.484135                | -4.869152 | -0.517166 |
| 50            | 1             | 0.141758                | -3.574822 | 0.639884  |
| 51            | 6             | 5.999523                | 2.998881  | -0.180318 |
| 52            | 1             | 5.869939                | 4.073134  | -0.275100 |

|    |   |          |           |           |
|----|---|----------|-----------|-----------|
| 53 | 6 | 7.615729 | -1.755647 | 0.289806  |
| 54 | 1 | 8.135330 | -1.429987 | 1.200074  |
| 55 | 1 | 7.411853 | -2.825983 | 0.352400  |
| 56 | 1 | 8.251972 | -1.555535 | -0.581918 |
| 57 | 8 | 6.351849 | -1.125316 | 0.162881  |
| 58 | 7 | 1.977089 | -1.272807 | -0.140757 |
| 59 | 1 | 0.953591 | -1.257845 | -0.107770 |
| 60 | 7 | 3.964554 | -0.155846 | -0.095292 |
| 61 | 1 | 4.284237 | -1.123897 | -0.050874 |
| 62 | 7 | 2.722807 | -2.418331 | -0.076676 |

**Table S5:** XYZ coordinates of self-assembly of polymorph **Methoxypoly2**.

| Center Number | Atomic Number | Coordinates (Angstroms) |           |           |
|---------------|---------------|-------------------------|-----------|-----------|
|               |               | X                       | Y         | Z         |
| 1             | 16            | 1.657162                | -1.393748 | 0.525606  |
| 2             | 6             | 2.141366                | 3.534266  | 0.630282  |
| 3             | 6             | 4.883709                | -0.803911 | -0.252472 |
| 4             | 6             | 2.562704                | 0.024376  | 0.341178  |
| 5             | 6             | 6.144965                | -0.241941 | -0.584462 |
| 6             | 6             | 4.757333                | -2.194730 | -0.220331 |
| 7             | 1             | 3.800278                | -2.627535 | 0.032792  |
| 8             | 6             | 7.231753                | -1.061161 | -0.875031 |
| 9             | 1             | 8.191763                | -0.626119 | -1.128388 |
| 10            | 6             | 2.994694                | 4.741597  | 0.347855  |
| 11            | 1             | 3.168867                | 5.317806  | 1.266425  |
| 12            | 1             | 2.490865                | 5.415860  | -0.357873 |
| 13            | 1             | 3.956505                | 4.442773  | -0.074790 |
| 14            | 6             | 0.765862                | 3.765651  | 1.200623  |
| 15            | 1             | 0.002738                | 3.753528  | 0.411634  |
| 16            | 1             | 0.716438                | 4.742716  | 1.690488  |
| 17            | 1             | 0.487612                | 2.998460  | 1.930403  |
| 18            | 6             | 5.854862                | -3.010101 | -0.512952 |
| 19            | 1             | 5.732869                | -4.088951 | -0.481963 |
| 20            | 6             | 7.085183                | -2.452371 | -0.839232 |
| 21            | 1             | 7.937924                | -3.085498 | -1.067287 |
| 22            | 6             | 7.404721                | 1.773593  | -0.911119 |
| 23            | 1             | 8.196161                | 1.511007  | -0.197416 |
| 24            | 1             | 7.203586                | 2.844628  | -0.851645 |
| 25            | 1             | 7.733961                | 1.520340  | -1.927026 |
| 26            | 8             | 6.183356                | 1.129561  | -0.588256 |
| 27            | 7             | 1.948789                | 1.237078  | 0.553657  |
| 28            | 1             | 0.931190                | 1.221108  | 0.672805  |
| 29            | 7             | 3.872688                | 0.134152  | 0.020993  |
| 30            | 1             | 4.179460                | 1.104864  | -0.050353 |
| 31            | 7             | 2.659670                | 2.390784  | 0.350712  |
| 32            | 16            | -1.657280               | 1.393893  | 0.525851  |
| 33            | 6             | -2.141283               | -3.534132 | 0.630460  |
| 34            | 6             | -4.883767               | 0.803879  | -0.252399 |
| 35            | 6             | -2.562729               | -0.024282 | 0.341331  |
| 36            | 6             | -6.144946               | 0.241812  | -0.584516 |
| 37            | 6             | -4.757510               | 2.194708  | -0.220215 |
| 38            | 1             | -3.800504               | 2.627577  | 0.032988  |
| 39            | 6             | -7.231787               | 1.060949  | -0.875122 |
| 40            | 1             | -8.191746               | 0.625834  | -1.128549 |
| 41            | 6             | -2.994530               | -4.741521 | 0.348005  |
| 42            | 1             | -2.490503               | -5.415907 | -0.357468 |
| 43            | 1             | -3.168945               | -5.317551 | 1.266628  |
| 44            | 1             | -3.956226               | -4.442778 | -0.074959 |
| 45            | 6             | -0.765830               | -3.765449 | 1.200972  |
| 46            | 1             | -0.487677               | -2.998191 | 1.930704  |
| 47            | 1             | -0.716448               | -4.742481 | 1.690918  |
| 48            | 1             | -0.002627               | -3.753383 | 0.412060  |
| 49            | 6             | -5.855088               | 3.009994  | -0.512887 |
| 50            | 1             | -5.733191               | 4.088854  | -0.481872 |

|    |   |           |           |           |
|----|---|-----------|-----------|-----------|
| 51 | 6 | -7.085340 | 2.452170  | -0.839262 |
| 52 | 1 | -7.938122 | 3.085236  | -1.067342 |
| 53 | 6 | -7.404472 | -1.773833 | -0.911378 |
| 54 | 1 | -7.733680 | -1.520512 | -1.927278 |
| 55 | 1 | -7.203216 | -2.844851 | -0.852011 |
| 56 | 1 | -8.195988 | -1.511415 | -0.197698 |
| 57 | 8 | -6.183207 | -1.129691 | -0.588372 |
| 58 | 7 | -1.948753 | -1.236951 | 0.553791  |
| 59 | 1 | -0.931159 | -1.220983 | 0.672896  |
| 60 | 7 | -3.872698 | -0.134124 | 0.021105  |
| 61 | 1 | -4.179402 | -1.104850 | -0.050304 |
| 62 | 7 | -2.659596 | -2.390689 | 0.350777  |

**Table S6:** XYZ coordinates of self-assembly of polymorph **Nitropoly1**.

| Center Number | Atomic Number | Coordinates (Angstroms) |           |           |
|---------------|---------------|-------------------------|-----------|-----------|
|               |               | X                       | Y         | Z         |
| 1             | 16            | -1.980248               | 0.860644  | -0.816777 |
| 2             | 6             | -4.841908               | -0.632753 | 0.153867  |
| 3             | 6             | -2.401382               | -0.749809 | -0.535113 |
| 4             | 6             | -5.163347               | 0.715670  | -0.081489 |
| 5             | 1             | -4.422426               | 1.377589  | -0.504457 |
| 6             | 6             | -1.003095               | -3.998229 | -0.716127 |
| 7             | 6             | -7.380343               | 0.324517  | 0.778124  |
| 8             | 6             | -5.820513               | -1.488372 | 0.702684  |
| 9             | 1             | -5.577320               | -2.531268 | 0.886443  |
| 10            | 6             | -7.084525               | -1.018153 | 1.015336  |
| 11            | 1             | -7.841599               | -1.665660 | 1.438645  |
| 12            | 6             | -6.432228               | 1.187451  | 0.233831  |
| 13            | 1             | -6.698330               | 2.222293  | 0.059045  |
| 14            | 6             | 0.329877                | -3.854809 | -1.401030 |
| 15            | 1             | 0.324554                | -3.058186 | -2.150111 |
| 16            | 1             | 0.604786                | -4.791146 | -1.892546 |
| 17            | 1             | 1.118513                | -3.620264 | -0.676039 |
| 18            | 6             | -1.442130               | -5.381135 | -0.322069 |
| 19            | 1             | -2.408525               | -5.353765 | 0.183373  |
| 20            | 1             | -0.704694               | -5.841426 | 0.346861  |
| 21            | 1             | -1.515689               | -6.027703 | -1.204841 |
| 22            | 7             | -3.610487               | -1.230839 | -0.134308 |
| 23            | 1             | -3.568712               | -2.239963 | 0.007563  |
| 24            | 7             | -1.472317               | -1.738055 | -0.726610 |
| 25            | 1             | -0.508878               | -1.435307 | -0.898428 |
| 26            | 7             | -1.808191               | -3.037257 | -0.425227 |
| 27            | 7             | -8.712957               | 0.832048  | 1.106366  |
| 28            | 8             | -9.528293               | 0.037987  | 1.580196  |
| 29            | 8             | -8.943915               | 2.023020  | 0.890196  |
| 30            | 16            | 1.980241                | -0.860643 | -0.816661 |
| 31            | 6             | 4.841882                | 0.632749  | 0.153929  |
| 32            | 6             | 2.401370                | 0.749821  | -0.535080 |
| 33            | 6             | 5.163353                | -0.715639 | -0.081588 |
| 34            | 1             | 4.422454                | -1.377524 | -0.504646 |
| 35            | 6             | 1.003149                | 3.998265  | -0.716189 |
| 36            | 6             | 7.380325                | -0.324545 | 0.778113  |
| 37            | 6             | 5.820460                | 1.488321  | 0.702866  |
| 38            | 1             | 5.577241                | 2.531189  | 0.886750  |
| 39            | 6             | 7.084477                | 1.018091  | 1.015481  |
| 40            | 1             | 7.841530                | 1.665562  | 1.438881  |
| 41            | 6             | 6.432238                | -1.187432 | 0.233697  |
| 42            | 1             | 6.698365                | -2.222247 | 0.058788  |
| 43            | 6             | -0.329733               | 3.854875  | -1.401274 |
| 44            | 1             | -0.324402               | 3.058123  | -2.150213 |
| 45            | 1             | -0.604446               | 4.791166  | -1.892993 |
| 46            | 1             | -1.118513               | 3.620575  | -0.676358 |
| 47            | 6             | 1.442076                | 5.381150  | -0.321934 |
| 48            | 1             | 2.408396                | 5.353764  | 0.183651  |
| 49            | 1             | 0.704525                | 5.841354  | 0.346928  |



|    |   |          |           |           |
|----|---|----------|-----------|-----------|
| 50 | 1 | 1.515746 | 6.027801  | -1.204636 |
| 51 | 7 | 3.610456 | 1.230841  | -0.134203 |
| 52 | 1 | 3.568685 | 2.239965  | 0.007675  |
| 53 | 7 | 1.472358 | 1.738092  | -0.726739 |
| 54 | 1 | 0.508843 | 1.435427  | -0.898277 |
| 55 | 7 | 1.808227 | 3.037291  | -0.425244 |
| 56 | 7 | 8.712943 | -0.832090 | 1.106318  |
| 57 | 8 | 9.528261 | -0.038068 | 1.580243  |
| 58 | 8 | 8.943921 | -2.023037 | 0.890026  |

**Table S7:** XYZ coordinates of self-assembly of polymorph **Nitropoly2**.

| Center Number | Atomic Number | Coordinates (Angstroms) |           |           |
|---------------|---------------|-------------------------|-----------|-----------|
|               |               | X                       | Y         | Z         |
| 1             | 16            | -0.226504               | 1.764528  | 1.219564  |
| 2             | 6             | -1.698485               | 1.909470  | 0.409782  |
| 3             | 6             | -4.106115               | 4.501465  | 1.538719  |
| 4             | 1             | -4.866519               | 4.161085  | 0.840231  |
| 5             | 6             | -2.850005               | 3.858276  | 1.567189  |
| 6             | 6             | -3.495532               | 0.413939  | -2.257104 |
| 7             | 6             | -3.403924               | 5.982975  | 3.282309  |
| 8             | 6             | -4.387431               | 5.557704  | 2.388344  |
| 9             | 1             | -5.349151               | 6.055057  | 2.372504  |
| 10            | 6             | -2.156057               | 5.365600  | 3.327530  |
| 11            | 1             | -1.413694               | 5.721599  | 4.031316  |
| 12            | 6             | -2.569020               | -0.593945 | -2.886276 |
| 13            | 1             | -1.553004               | -0.200984 | -3.001455 |
| 14            | 1             | -2.936083               | -0.889971 | -3.872410 |
| 15            | 1             | -2.498363               | -1.501423 | -2.272557 |
| 16            | 6             | -4.868648               | 0.574363  | -2.849461 |
| 17            | 1             | -5.449765               | 1.314416  | -2.295130 |
| 18            | 1             | -5.406949               | -0.382558 | -2.836366 |
| 19            | 1             | -4.801304               | 0.885298  | -3.900239 |
| 20            | 6             | -1.872531               | 4.305501  | 2.473799  |
| 21            | 1             | -0.906314               | 3.824196  | 2.504494  |
| 22            | 7             | -1.995312               | 1.058852  | -0.624308 |
| 23            | 1             | -1.321788               | 0.311100  | -0.815365 |
| 24            | 7             | -3.218413               | 1.152260  | -1.240467 |
| 25            | 7             | -2.690538               | 2.812153  | 0.651454  |
| 26            | 1             | -3.486127               | 2.653409  | 0.032535  |
| 27            | 7             | -3.691223               | 7.097573  | 4.185205  |
| 28            | 8             | -4.805032               | 7.621210  | 4.113168  |
| 29            | 8             | -2.804495               | 7.449254  | 4.965303  |
| 30            | 16            | 0.226504                | -1.764528 | -1.219564 |
| 31            | 6             | 1.698485                | -1.909470 | -0.409782 |
| 32            | 6             | 4.106115                | -4.501465 | -1.538719 |
| 33            | 1             | 4.866519                | -4.161085 | -0.840231 |
| 34            | 6             | 2.850005                | -3.858276 | -1.567189 |
| 35            | 6             | 3.495532                | -0.413939 | 2.257104  |
| 36            | 6             | 3.403924                | -5.982975 | -3.282309 |
| 37            | 6             | 4.387431                | -5.557704 | -2.388344 |
| 38            | 1             | 5.349151                | -6.055057 | -2.372504 |
| 39            | 6             | 2.156057                | -5.365600 | -3.327530 |
| 40            | 1             | 1.413694                | -5.721599 | -4.031316 |
| 41            | 6             | 2.569020                | 0.593945  | 2.886276  |
| 42            | 1             | 1.553004                | 0.200984  | 3.001455  |
| 43            | 1             | 2.936083                | 0.889971  | 3.872410  |
| 44            | 1             | 2.498363                | 1.501423  | 2.272557  |
| 45            | 6             | 4.868648                | -0.574363 | 2.849461  |
| 46            | 1             | 5.449765                | -1.314416 | 2.295130  |
| 47            | 1             | 5.406949                | 0.382558  | 2.836366  |
| 48            | 1             | 4.801304                | -0.885298 | 3.900239  |
| 49            | 6             | 1.872531                | -4.305501 | -2.473799 |
| 50            | 1             | 0.906314                | -3.824196 | -2.504494 |
| 51            | 7             | 1.995312                | -1.058852 | 0.624308  |

|    |   |          |           |           |
|----|---|----------|-----------|-----------|
| 52 | 1 | 1.321788 | -0.311100 | 0.815365  |
| 53 | 7 | 3.218413 | -1.152260 | 1.240467  |
| 54 | 7 | 2.690538 | -2.812153 | -0.651454 |
| 55 | 1 | 3.486127 | -2.653409 | -0.032535 |
| 56 | 7 | 3.691223 | -7.097573 | -4.185205 |
| 57 | 8 | 4.805032 | -7.621210 | -4.113168 |
| 58 | 8 | 2.804495 | -7.449254 | -4.965303 |

**Table S8:** XYZ coordinates of self-assembly of polymorph Nitropoly3.

| Center Number | Atomic Number | Coordinates (Angstroms) |           |           |
|---------------|---------------|-------------------------|-----------|-----------|
|               |               | X                       | Y         | Z         |
| 1             | 16            | 5.804967                | 2.786162  | -0.023443 |
| 2             | 6             | 4.139452                | 2.599764  | 0.028993  |
| 3             | 6             | 5.199041                | -1.631767 | -1.157164 |
| 4             | 1             | 6.196955                | -2.018656 | -1.325171 |
| 5             | 6             | 3.703688                | 0.182565  | -0.585615 |
| 6             | 6             | 5.006380                | -0.300258 | -0.805439 |
| 7             | 1             | 5.851978                | 0.363701  | -0.697779 |
| 8             | 6             | 4.104507                | -2.483033 | -1.293406 |
| 9             | 6             | 1.350864                | 4.674630  | 0.776199  |
| 10            | 6             | 2.606768                | -0.695187 | -0.737972 |
| 11            | 1             | 1.598117                | -0.326989 | -0.561766 |
| 12            | 6             | 2.802446                | -2.019252 | -1.092024 |
| 13            | 1             | 1.967152                | -2.696228 | -1.224956 |
| 14            | 6             | -0.142092               | 4.551750  | 0.878789  |
| 15            | 1             | -0.467446               | 3.529428  | 0.670634  |
| 16            | 1             | -0.633762               | 5.235493  | 0.173913  |
| 17            | 1             | -0.483028               | 4.835107  | 1.883682  |
| 18            | 6             | 1.986200                | 6.018844  | 1.050048  |
| 19            | 1             | 2.673709                | 5.971822  | 1.905780  |
| 20            | 1             | 1.226900                | 6.770562  | 1.276876  |
| 21            | 1             | 2.560970                | 6.374752  | 0.184342  |
| 22            | 7             | 3.380603                | 1.492055  | -0.219225 |
| 23            | 1             | 2.383152                | 1.676767  | -0.106089 |
| 24            | 7             | 3.372553                | 3.693803  | 0.363427  |
| 25            | 1             | 3.891417                | 4.542826  | 0.563196  |
| 26            | 7             | 2.011789                | 3.616202  | 0.458971  |
| 27            | 7             | 4.316364                | -3.886137 | -1.640795 |
| 28            | 8             | 3.326115                | -4.622518 | -1.682694 |
| 29            | 8             | 5.469253                | -4.259015 | -1.863279 |
| 30            | 16            | -0.993584               | 0.803562  | -0.057196 |
| 31            | 6             | -1.616859               | -0.604545 | 0.621441  |
| 32            | 6             | -5.481511               | 1.031613  | -1.084585 |
| 33            | 1             | -5.595450               | 1.934454  | -1.671975 |
| 34            | 6             | -4.104383               | -0.544170 | 0.126169  |
| 35            | 6             | -4.228293               | 0.631768  | -0.633648 |
| 36            | 1             | -3.352113               | 1.219697  | -0.864831 |
| 37            | 6             | -6.606033               | 0.267201  | -0.783664 |
| 38            | 6             | -0.340460               | -3.396208 | 2.410939  |
| 39            | 6             | -5.256856               | -1.303941 | 0.415632  |
| 40            | 1             | -5.166359               | -2.214712 | 1.002487  |
| 41            | 6             | -6.504629               | -0.905189 | -0.034586 |
| 42            | 1             | -7.394998               | -1.481337 | 0.183754  |
| 43            | 6             | -0.856678               | -4.682726 | 2.988679  |
| 44            | 1             | -1.928935               | -4.786685 | 2.810025  |
| 45            | 1             | -0.336159               | -5.539758 | 2.541932  |
| 46            | 1             | -0.668180               | -4.724501 | 4.069427  |
| 47            | 6             | 1.128945                | -3.077556 | 2.556540  |
| 48            | 1             | 1.281992                | -2.117250 | 3.067309  |
| 49            | 1             | 1.638882                | -3.847910 | 3.138933  |
| 50            | 1             | 1.628202                | -3.016670 | 1.580011  |
| 51            | 7             | -2.901788               | -1.052580 | 0.635927  |
| 52            | 1             | -2.983019               | -1.943367 | 1.125212  |
| 53            | 7             | -0.754882               | -1.460822 | 1.266340  |
| 54            | 1             | 0.218480                | -1.175973 | 1.294739  |

|    |   |           |           |           |
|----|---|-----------|-----------|-----------|
| 55 | 7 | -1.192914 | -2.635644 | 1.816708  |
| 56 | 7 | -7.920810 | 0.699936  | -1.261483 |
| 57 | 8 | -8.892839 | -0.002143 | -0.976861 |
| 58 | 8 | -7.978777 | 1.739468  | -1.919727 |

---
